# Supplementary material for: Clinical Outcomes after Intravenous Alteplase in Elderly Patients with Acute Ischaemic Stroke: A Retrospective Analysis of Patients Treated at a Tertiary Neurology Centre in England from 2013 to 2018
Source: Hindawi journal article supplement (doi:10.1155/2021/3738017), 2021-10-31

### Proportion of good vs poor outcomes at discharge over 6 years

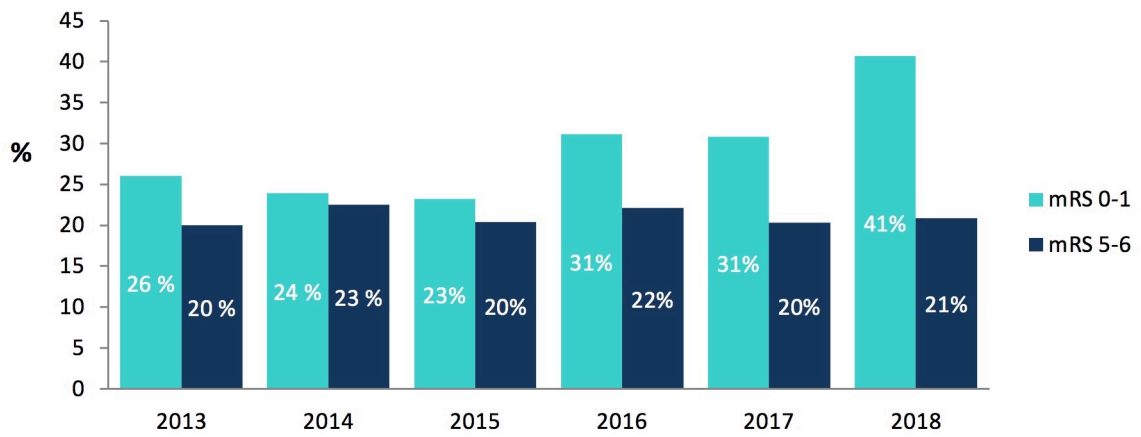

Supplement: f1 [file 3738017.f1.pdf]
